# Supplementary material
Source: PubMed Central journal article supplement (PMC4324395)

Supplementary Figure S1

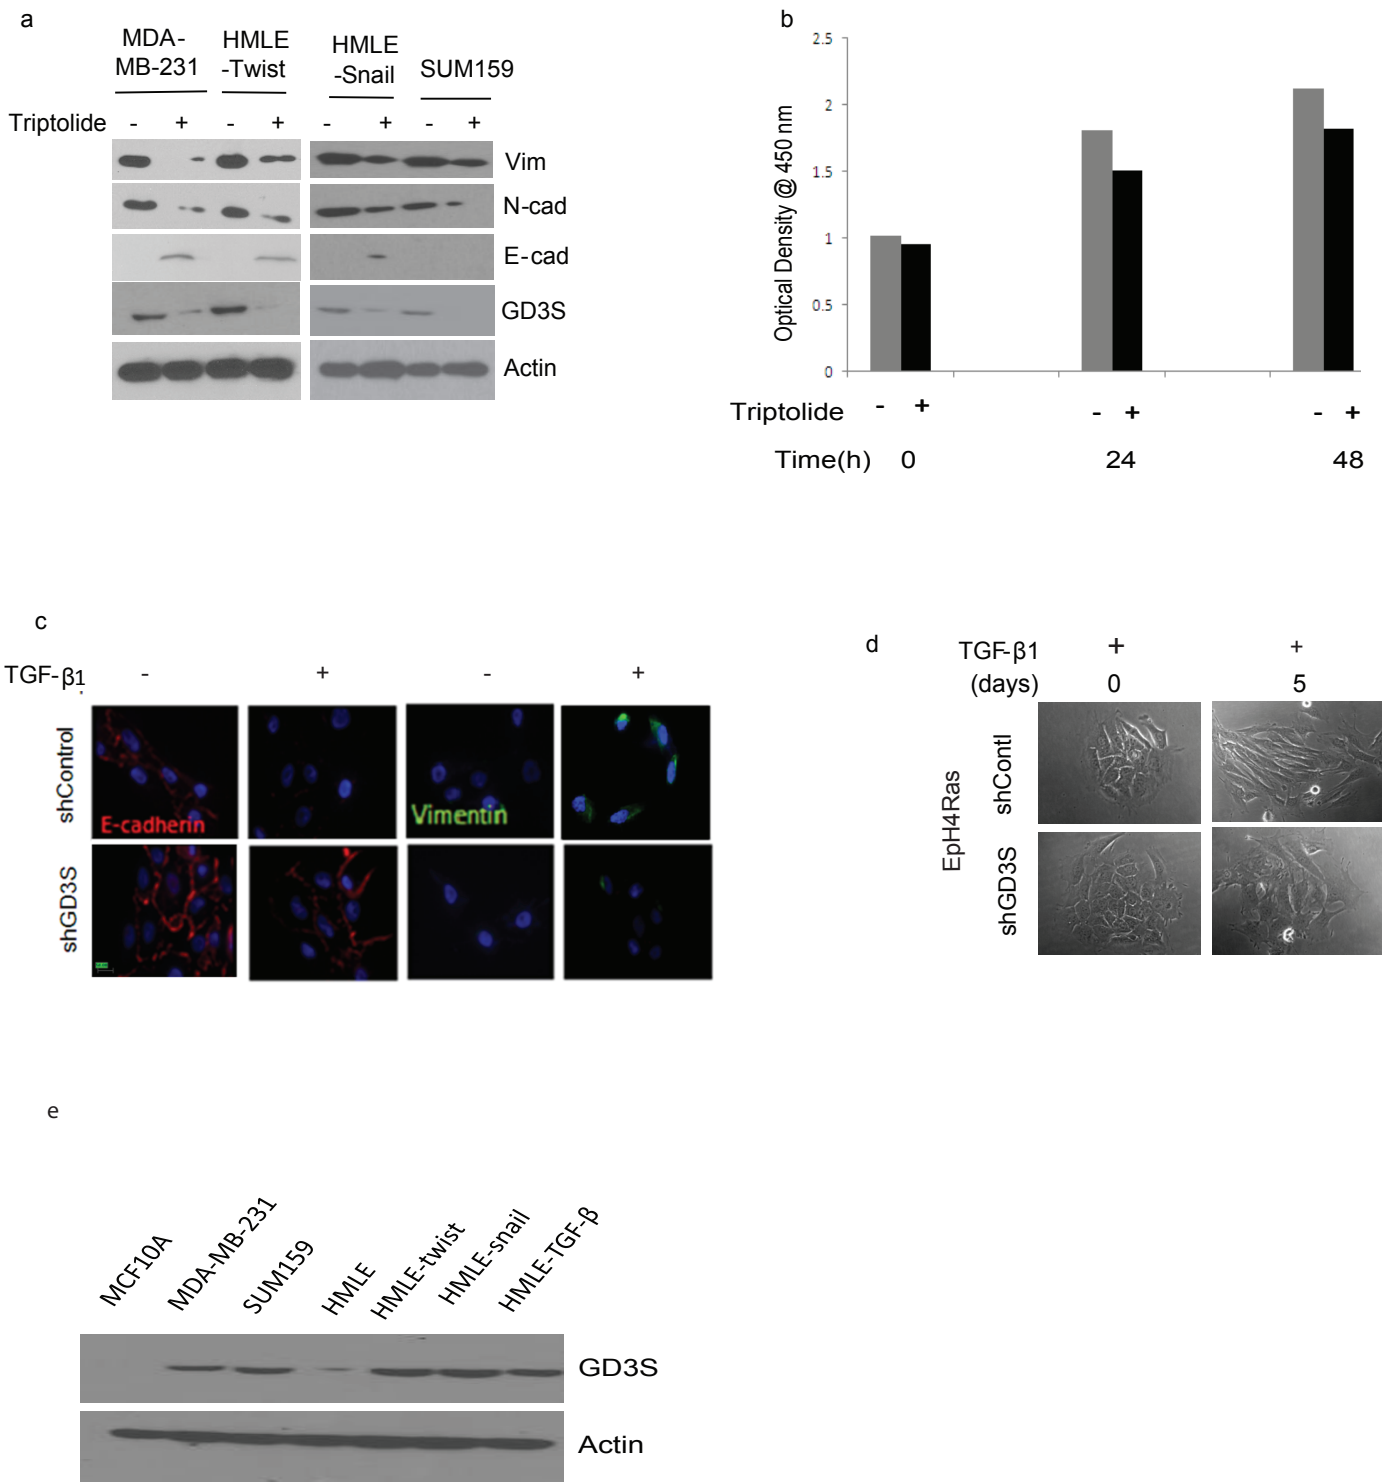

Supplementary Figure S2

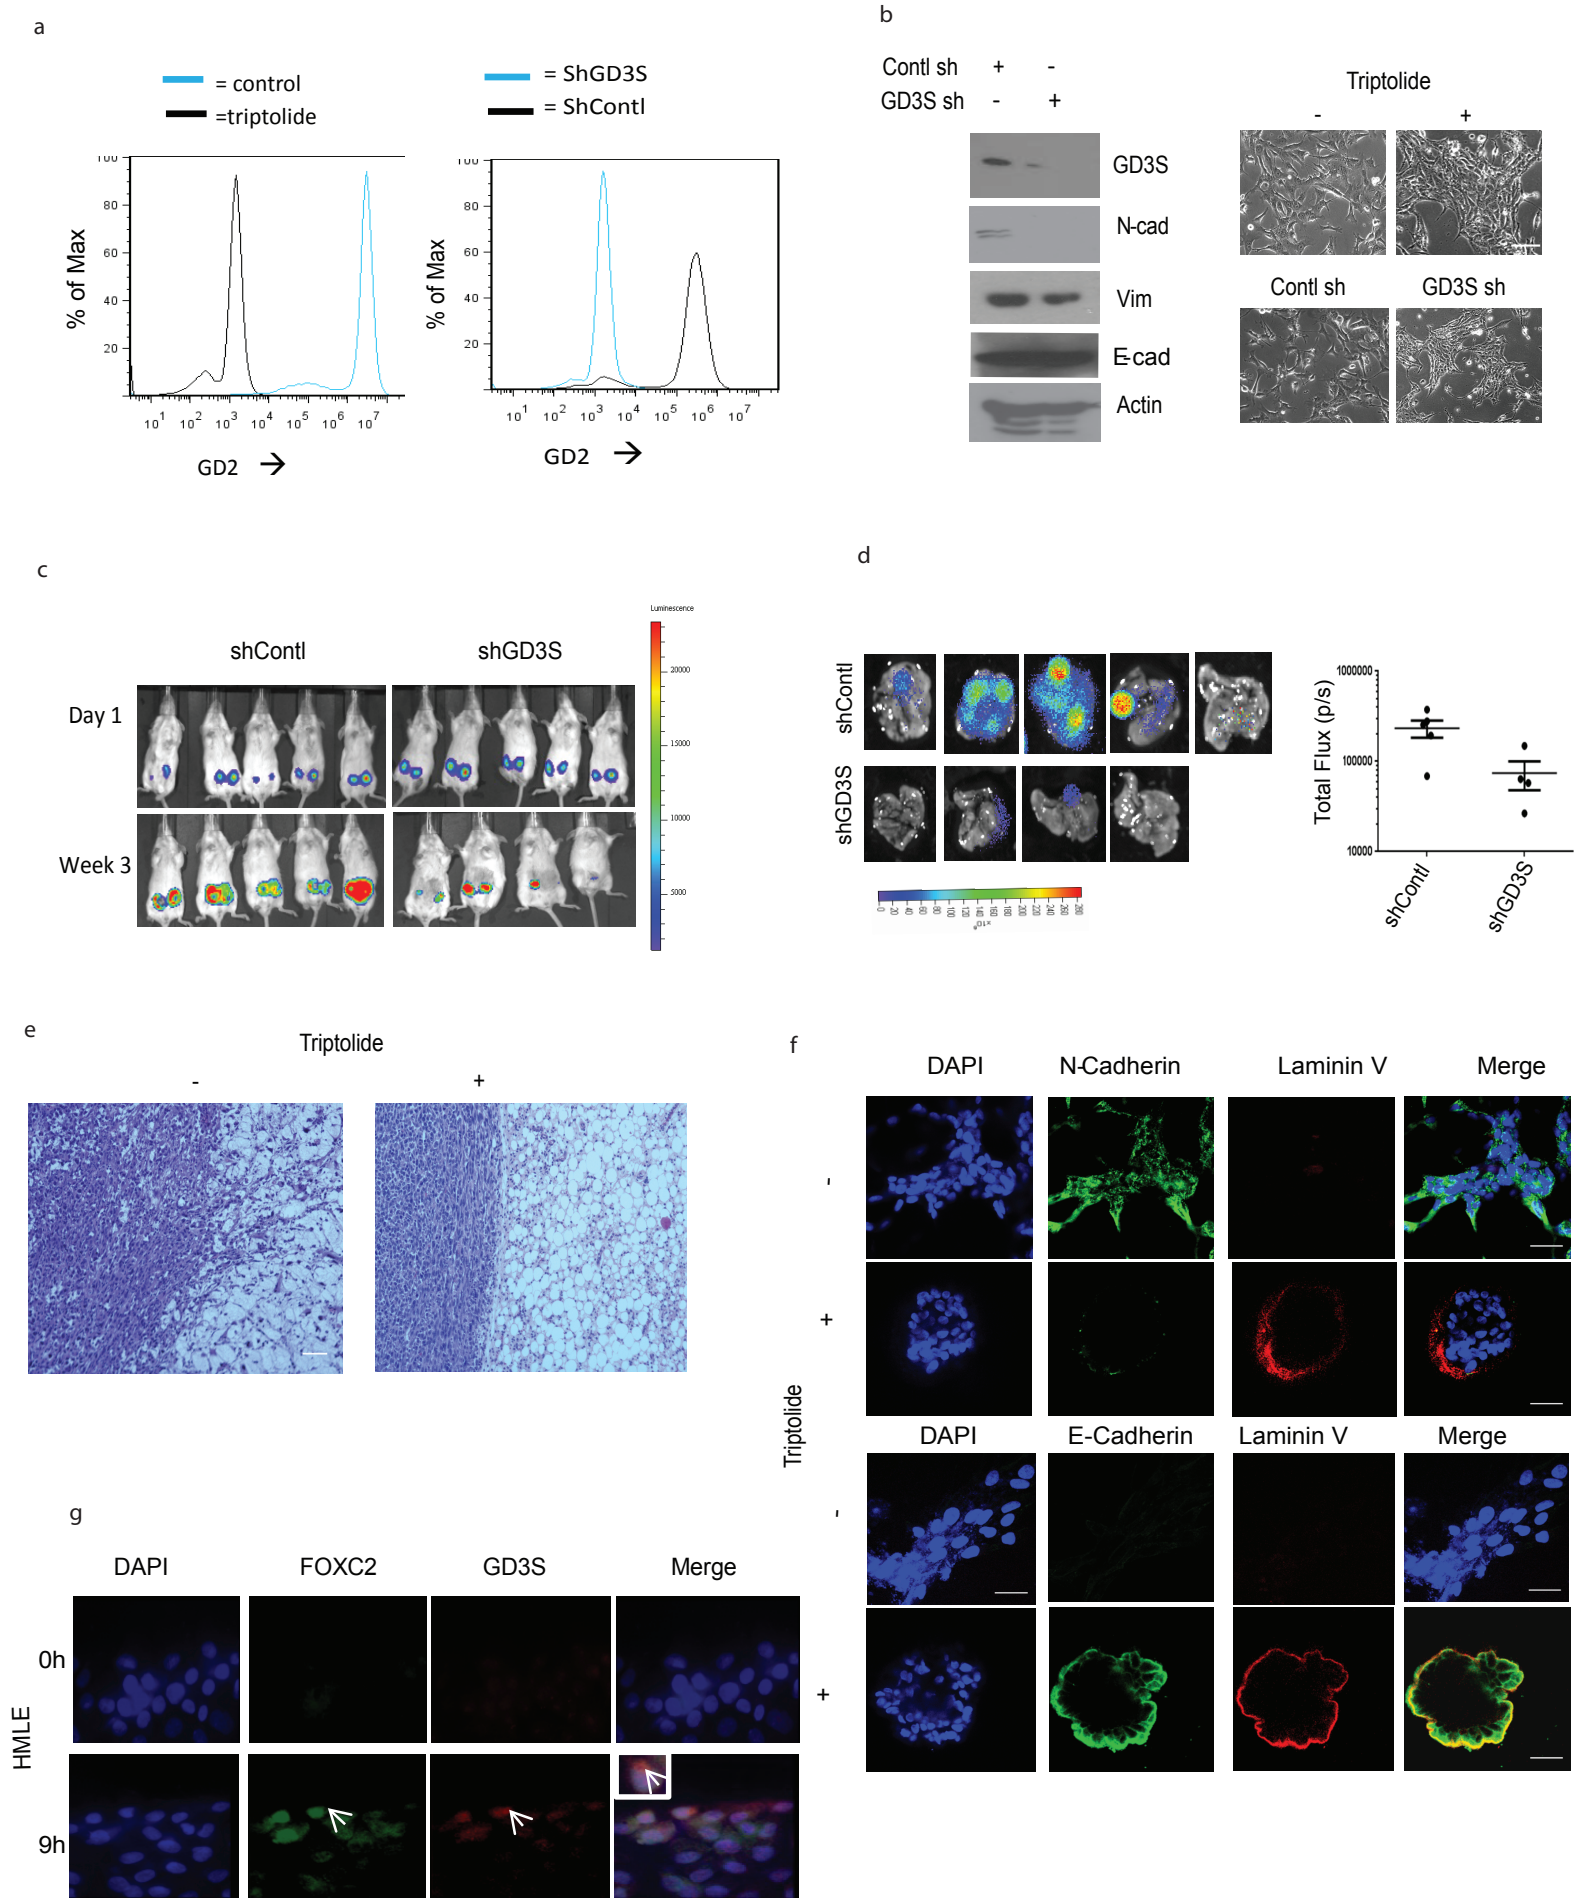

Supplementary fig S3

a

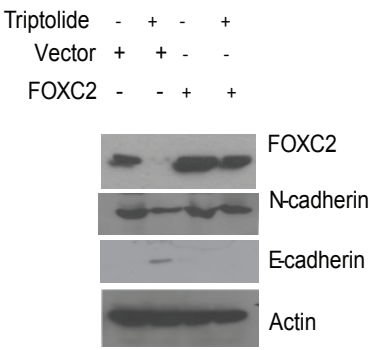

b

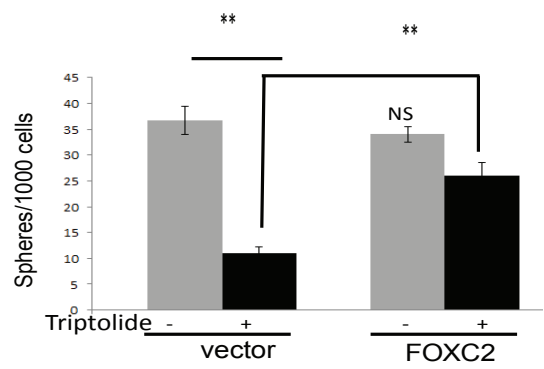

c

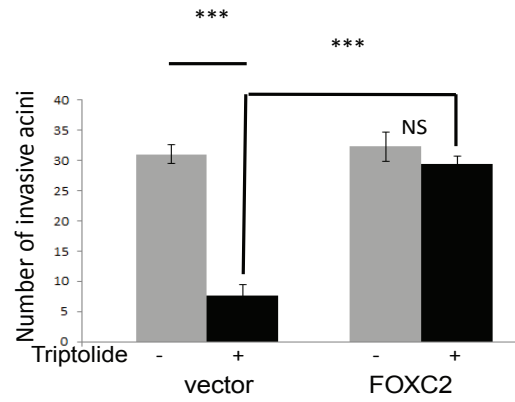

d

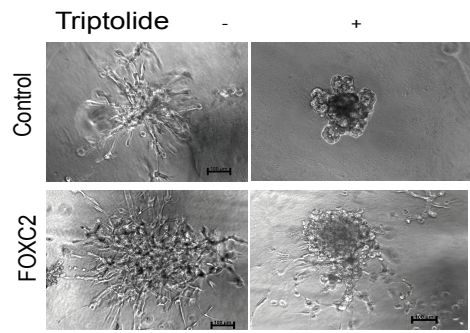

e

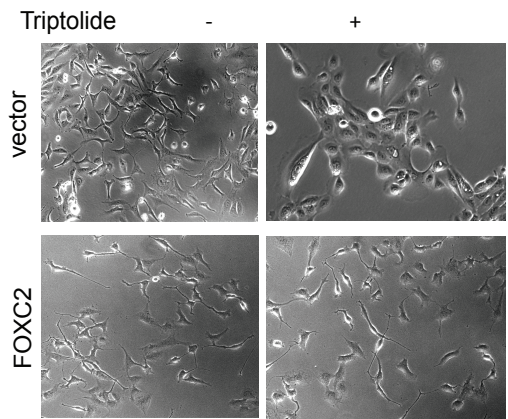

f

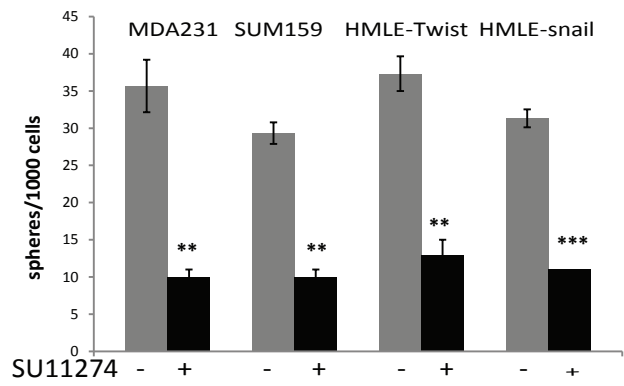

Supplement: NIHMS630319-supplement-Suppl__Figures.pdf [file NIHMS630319-supplement-Suppl__Figures.pdf]
